# Supplementary material for: Comparative Phylogenomics Uncovers the Impact of Symbiotic Associations on Host Genome Evolution
Source: PLoS Genet. 2014 Jul 17;10(7):e1004487. doi: 10.1371/journal.pgen.1004487 (PMC4102449; doi:10.1371/journal.pgen.1004487)
Supplement: Table S16 — Genes found in at least 13 plant species using both rice and Medicago as references and missing from the sequenced genomes of the Brassicaceae Arabidopsis thaliana, Arabidopsis lyrata, Brassica rapa, Capsella rubella, and Thellungiella halophila, from the genomes of Beta vulgaris and Utricularia gibba, and from the transcriptomes of Striga hermontica, Orobanche aegyptiana, and present in Lupinus albus. (XLSX) [file pgen.1004487.s022.xlsx]

## Sheet: Feuil1
Table S16. Genes found in at least 13 plant species using both Rice and Medicago as reference and missing in the sequenced genomes of the Brassicaceae Arabidopsis thaliana, Arabidpsis lyrata, Brassica rapa, Capsella rubella and Thellungiella halophila, in the genome of Beta vulgarisand Utricularia gibba, and in the transcriptome of Striga hermontica, Orobanche aegyptiana and present in Lupinus al…
	membrane remodeling / cellular traffiking
	transporter
	Signaling
	up regulated during mycorrhization
Accession numbers	Comment	annotation
Medtr1g012380		Pentatricopeptide repeat-containing protein
Medtr7g093900		Pentatricopeptide repeat-containing protein
Medtr5g030920	DMI2	Nodulation receptor kinase
Medtr5g019040	NFP	LysM-domain containing receptor-like kinase
Medtr7g088070		Myb family transcription factor APL
Medtr3g109090		RNA-binding protein
Medtr2g089100		GRAS
Medtr7g022470		hypothetical protein
Medtr8g043970	DMI3	Calcium/calmodulin dependent protein kinase
Medtr4g095260		ABI3-interacting protein
Medtr5g026850	IPD3	CYCLOPS
Medtr8g093750		hypothetical protein
